# Supplementary material for: Preparation and analysis of zero gases for the measurement of trace VOCs in air monitoring
Source: Copernicus journal article supplement (doi:10.5194/amt-2017-412), 2017-11-28
Supplement: Supplementary file [file amt-2017-412-AC3-supplement.pdf]

**Author's response to AMT review - first stage (Response to comment by Marta Doval Miñarro) Atmos. Meas. Tech. Discuss., doi:10.5194/amt-2017-412, 2017**

**“Preparation and analysis of zero gases for the measurement of trace VOCs in air monitoring”**

- 5 Jennifer Englert, Anja Claude, Alessia Demichelis, Stefan Persijn, Annarita Baldan, Jianrong Li, Christian Plass-Duelmer, Katja Michl, Erasmus Tensing, Rina Wortman, Yousra Ghorafi, Maricarmen Lecuna, Guido Sassi, Maria Paola Sassi, Dagmar Kubistin

**Short comment by Marta Doval Miñarro**

- 10 *This paper presents the performance of several gas purifiers to produce zero gas for measuring VOCs. The availability of high purity and certified zero gases for atmospheric measurements is one of the issues that has to be tackled in order to achieve further reductions in measurement uncertainty. The information presented in this paper is interesting and it moves towards this direction; however, I miss in the Introduction section a reference to previous work in this field. There are not many papers dealing with this topic so I find it necessary to cite the few of them in order to properly contextualise the*
- 15 *manuscript of the authors. Some of the references I miss:*

*Miñarro et al. (2014) Zero gas reference standards. Analytical Methods 8, 15, 3014-3022.*

*Haerri H.P (2009) Trace gas analysis for the evaluation of zero air generators. Accreditation and Quality Assurance 14, 12, 647-654.*

Response:

- 20 We inserted the references suggested. Thanks for this important suggestion.
